# Supplementary material
Source: PubMed Central journal article supplement (PMC2807342)
Supplement: supp_M109.029132_jbc.M109.029132-1.pdf [file supp_M109.029132_jbc.M109.029132-1.pdf]

## SUPPLEMENTARY EXPERIMENTAL PROCEDURES

***Myosin Light Chain Phosphorylation*** - MLC phosphorylation in retracting fibrin clots was performed according to a modified method of Daniel et al (1). <sup>32</sup>P-labelled washed human platelets were preincubated with vehicle (DMSO) or LY294002 (LY - 25  $\mu$ M), prior to initiation of the fibrin clot with thrombin (1.0 U/ml) in the presence of 0.5 mg/ml fibrinogen. Clot retraction was terminated at the indicated times by addition of 5x Reducing Buffer (50 mM Hepes, 10% SDS, 25 mM EDTA, 50% glycerol, 0.025% bromophenol blue, 100 mM dithiothreitol) in the presence of protease and phosphatase inhibitors (25  $\mu$ g/ml aprotinin, 10  $\mu$ M Leupeptin, 25  $\mu$ g/ml PMSF, 1 mM benzamidine, 100 nM okadaic acid, 1 mM sodium vanadate, 5 mM EDTA, 25 mM sodium fluoride, and 2.5 mM  $\beta$ -Glycerolphosphate) and further solubilised by sonication. Proteins were separated on 12.5% SDS-PAGE gel, stained with Coomassie blue, and exposed to x-ray film. Band densities were quantified with densitometry using Chemigenius Genesnap™ software (Syngene, Cambridge).

***Measurement of Actin Filament Assembly*** - Filamentous (F)-actin was quantified as described previously (2). Briefly, washed human platelets ( $5.0 \times 10^7$  /ml) were pretreated with either vehicle (DMSO) or LY294002 (25  $\mu$ M), stimulated with 1U/ml thrombin for the indicated times, and fixed by addition of paraformaldehyde (final 2%) for 3 minutes at room temperature. Fixed platelets were permeabilized and F-actin stained using 0.1% Triton X-100 containing FITC-conjugated phalloidin (1  $\mu$ M) for a further 5 minutes. The level of F-actin was analysed by flow cytometry (FACScan flow cytometer, Beckton-Dickinson). Results are expressed as fold increase over the amount of F-actin in resting platelets.

## SUPPLEMENTARY FIGURE LEGENDS

**SUPPLEMENTARY FIGURE 1. Effect of PI3K Inhibition on Thrombin-Induced Platelet Spreading on a High Density Fibrinogen Matrix.** Washed platelets were pretreated with vehicle alone (DMSO) or LY294002 (LY: 25  $\mu$ M). Platelets ( $1 \times 10^7$ /ml) were applied to immobilized fibrinogen (100  $\mu$ g/ml) in the presence of 1 U/ml thrombin (Thr), as described under “Experimental Procedures”. Platelet spreading was imaged at the indicated time points using phase contrast microscopy and quantified using MCID computer-based analysis programs. Results represent the mean  $\pm$  SEM of 3 independent experiments.

**SUPPLEMENTARY FIGURE 2. PI3K p110 $\beta$  is the Major Isoform Regulating Thrombin-Induced Clot Retraction.** Washed platelets derived from (A) human blood ( $3.0 \times 10^8$ /ml) or (B,C) from p110 $\gamma^{+/+}$ , p110 $\gamma^{-/-}$ , p110 $\delta^{+/+}$  or p110 $\delta^{-/-}$  mice ( $2.5 \times 10^8$ /ml), were preincubated with vehicle alone (DMSO), LY294002 (LY: 25  $\mu$ M) or the PI 3-kinase p110 $\beta$  selective inhibitor TGX221 (221: 0.5  $\mu$ M), in the presence or absence of ADP/TxA2 antagonists (see “Experimental Procedures”). Platelets were supplemented with 0.5 mg/ml fibrinogen prior to stimulation with 1 U/ml thrombin and the extent of clot retraction quantified as described under “Experimental Procedures”. Results represent the mean  $\pm$  SEM of 4 (Ai) and 3 (Aii, B, C) independent experiments (<sup>ns</sup>,  $p > 0.05$ ; \*\*,  $P < 0.01$ \*\*\*,  $p < 0.001$ ).

**SUPPLEMENTARY FIGURE 3. PI3K does not Regulate Myosin Light Chain Phosphorylation nor F-Actin Polymerization.** (A) <sup>32</sup>P-radiolabeled washed platelets pretreated with vehicle alone or LY294002 (LY: 25  $\mu$ M) were supplemented with 0.5 mg/ml fibrinogen and stimulated with 1U/ml thrombin for indicated time. At each time point, samples were lysed and proteins run on SDS-PAGE under reduced conditions. The level of myosin light chain (MLC) phosphorylation was determined by autoradiography. This image is taken from one representative of 3 independent experiments. (B) Washed platelets were pretreated with vehicle alone (DMSO) or LY294002 (LY: 25  $\mu$ M) prior to stimulation with 1U/ml thrombin. Stimulated samples were lysed at the indicated time points, and F-actin measured by flow cytometry, using FITC-phalloidin, as described under “Supplementary Experimental Procedures”.

**SUPPLEMENTARY FIGURE 4. Soluble Agonist Stimulation is Required to Achieve Platelet Spreading on Low Density Immobilized Fibrinogen.** Washed platelets ( $5 \times 10^7$ /ml) were applied to immobilized fibrinogen (0.2, 1 or 5  $\mu$ g/ml) in the absence (no agonist) or presence of 1 U/ml thrombin (Thr), as described under “Experimental Procedures”. Platelet spreading was imaged in real time and recorded onto DVD. Images were obtained off-line at a 15 minute time point using PowerDVD™, and are taken from 1 representative of 3 independent experiments.

**SUPPLEMENTARY VIDEO 1. PI3K strengthens the interaction of integrin  $\alpha_{IIb}\beta_3$  with immobilized fibrinogen.** DiIC<sub>12</sub> labelled washed platelets pretreated with either vehicle (DMSO) or wortmannin (100 nM) were allowed to adhere and spread on immobilised fibrinogen (5  $\mu$ g/ml) in the presence of 1 U/ml thrombin. The interaction of platelets with the matrix was observed in real time using TIRF and DIC microscopy as described under “Experimental Procedures”. This video is shown at x 5 original speed.

## **SUPPLEMENTARY REFERENCES**

1. Daniel, J. L., Molish, I. R., and Holmsen, H. (1981) *J Biol Chem* **256**, 7510-7514
2. Hartwig, J. H. (1992) *J Cell Biol* **118**, 1421-1442

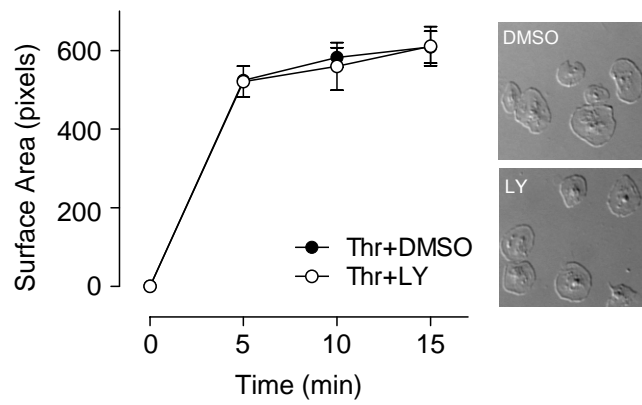

Supplementary Figure 1

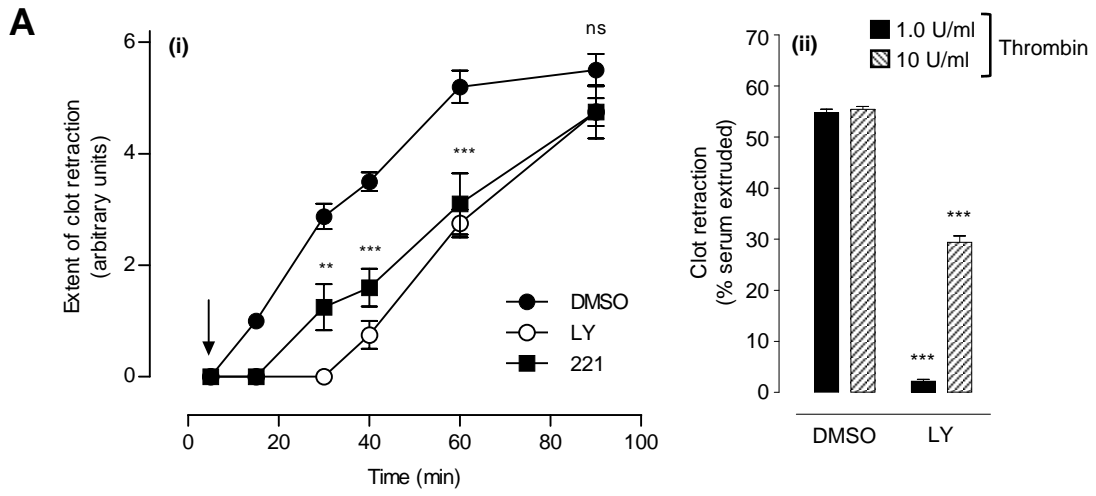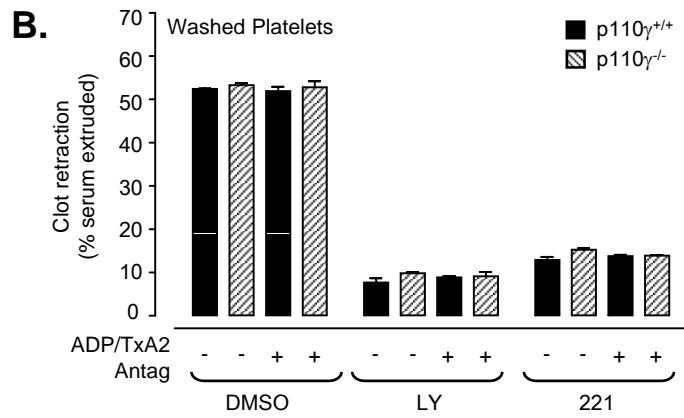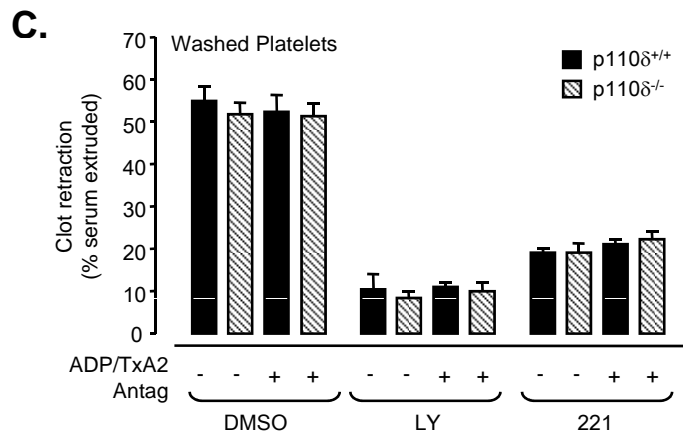

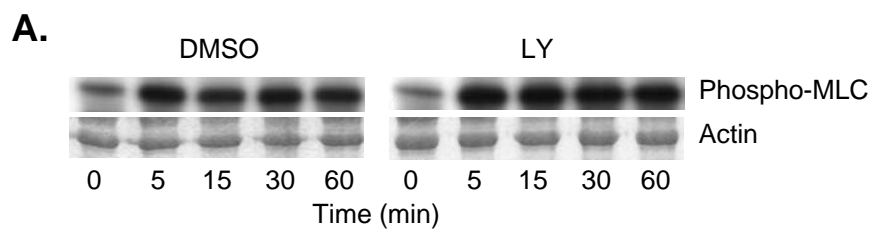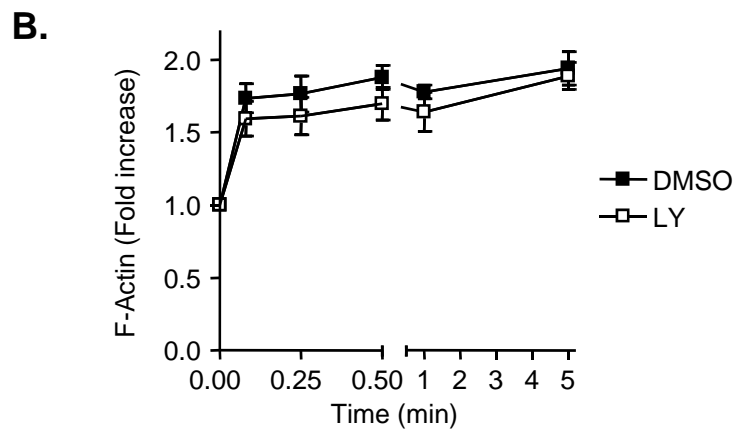

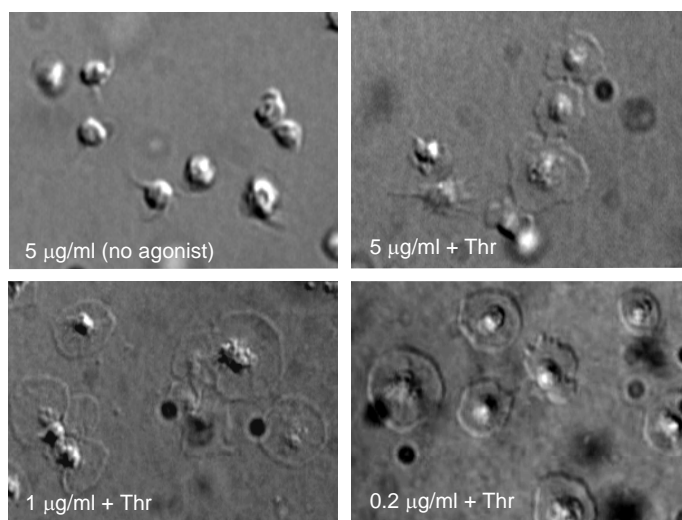

**Supplementary Figure 4**
